# Supplementary material for: Raman spectroscopy of a few layers of bismuth telluride nanoplatelets
Source: Royal Society of Chemistry journal article supplement (doi:10.1039/d3na00585b), 2023-01-01
Supplement: d3na00585b1.pdf [file d3na00585b1.pdf]

## Dimensionality effects on the Raman spectrum of bismuth telluride nanoplatelets

Victor Carozo,<sup>1,\*</sup> Bruno R. Carvalho,<sup>2</sup> Syed Hamza Safeer,<sup>3</sup>  
Leandro Seixas,<sup>4</sup> Pedro Venezuela,<sup>5</sup> and Mauricio Terrones<sup>6</sup>

<sup>1</sup>*Department of Physics, Pontifical Catholic University of Rio de Janeiro,  
Rio de Janeiro, RJ 22451900, Brazil*

<sup>2</sup>*Departamento de Física, Universidade Federal do Rio Grande do Norte,  
Natal, Rio Grande do Norte 59078-970, Brazil*

<sup>3</sup>*Department of Physics, Materials Science Lab,*

*Quaid-i-Azam University, Islamabad, 45320, Pakistan*

<sup>4</sup>*School of Engineering, Mackenzie Presbyterian University,*

*Rua da Consolação, 930, São Paulo, SP, 01302-907, Brazil.*

<sup>5</sup>*Institute of Physics, Fluminense Federal University, Niteroi, RJ, 24210-346, Brazil*

<sup>6</sup>*Department of Physics and Department of Materials Science and Engineering,*

*The Pennsylvania State University, University Park, PA 16802, USA.*

SUPPLEMENTARY INFORMATION

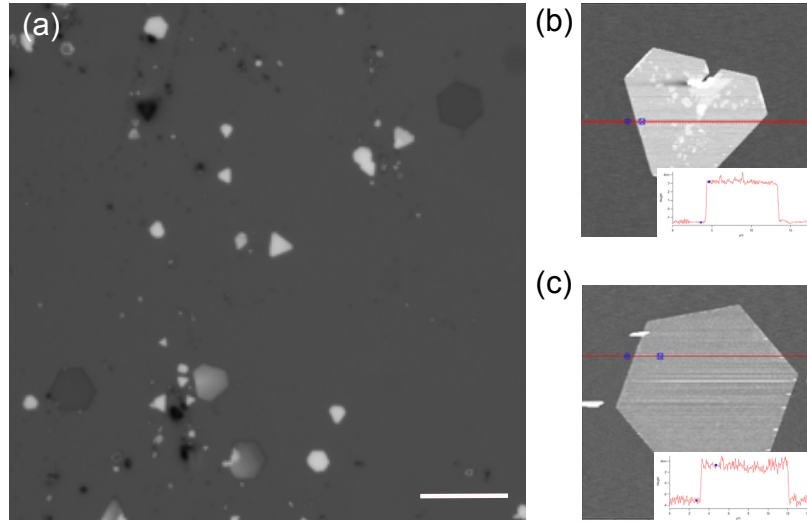

Figure S1. (a) Optical microscopy image of Bi<sub>2</sub>Te<sub>3</sub> islands. (b) AFM image for 4 QL's, inset the line profile showing the step high of 4 nm (c) AFM topography image of 7 QL's. Scale bar 20 $\mu$ m

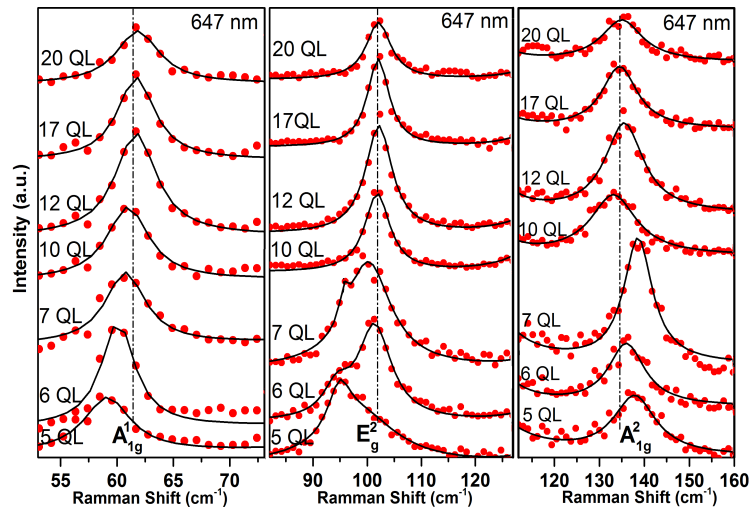

Figure S2. Raman spectra evolution for laser excitation of 1.92 eV. A<sub>1g</sub><sup>1</sup>, E<sub>g</sub><sup>2</sup>, and A<sub>1g</sub><sup>2</sup> phonon modes position versus thickness. The black lines are the curve adjusted.

\* vcarozo@puc-rio.br

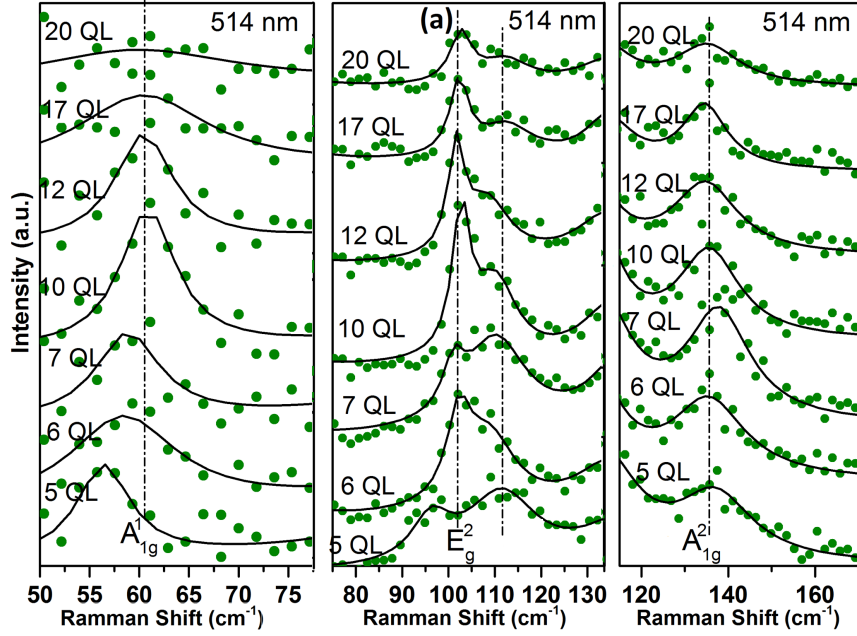

Figure S3. Raman spectra evolution for laser excitation of 2.41 eV.  $A_{1g}^1$ ,  $E_g^2$ , and  $A_{1g}^2$  phonon modes position versus thickness. The black lines are the curve adjusted.

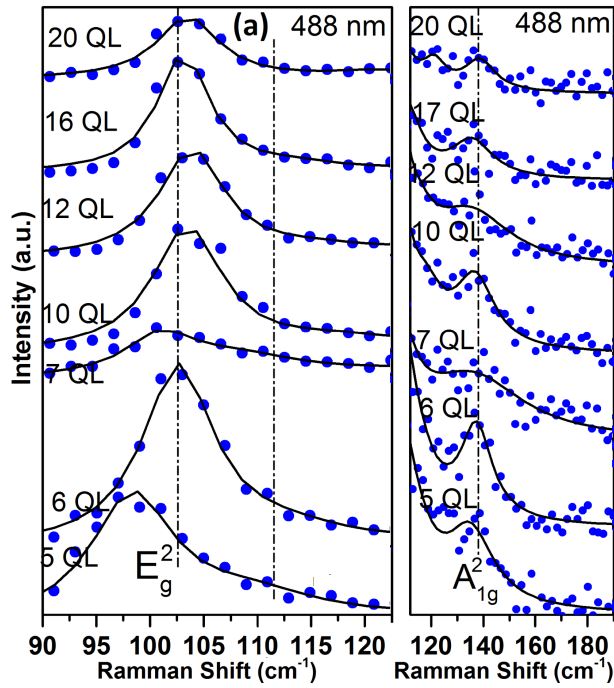

Figure S4. Raman spectra evolution for laser excitation of 2.54 eV.  $E_g^2$ , and  $A_{1g}^2$  phonon modes position versus thickness. The black lines are the curve adjusted.

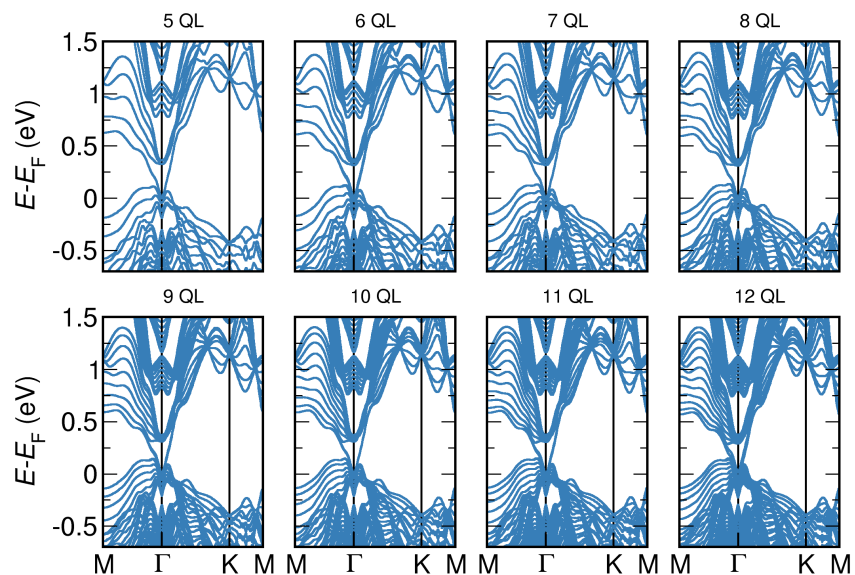

Figure S5. DFT calculation of band structure for different QDs.

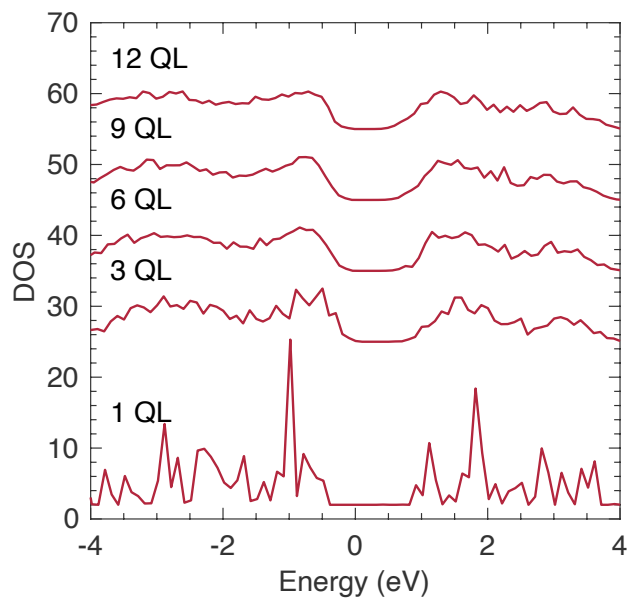

Figure S6. Calculation of electronic density of states for different QDs.
